# Supplementary material
Source: publisher figshare collection journal article supplement (https://sage.figshare.com/ndownloader/files/22215144)
Supplement: Supplementary file 1 [file 22215144]

## Sheet: OSL Dates
Optical stimulated luminescence dates:
Site name	Region	Province, District city/County	Lab nov.	Longitude(E)	Latitude(N)	Elevation(m)	Material	Method	OSL age Cal yr BP	Error	Reference
Dadiwan	North	Gansu,Tianshui	Unkown	105.904	35.015	1456	Unkown	OSL	47880	4360	Zhang et al.,2010
Dadiwan	North	Gansu,Tianshui	Unkown	105.904	35.015	1456	Unkown	OSL	40090	3460	Zhang et al.,2010
Dadiwan	North	Gansu,Tianshui	Unkown	105.904	35.015	1456	Unkown	OSL	26290	2840	Zhang et al.,2010
Dadiwan	North	Gansu,Tianshui	Unkown	105.904	35.015	1456	Unkown	OSL	21800	2110	Zhang et al.,2010
Heimahe1	Qinghai-Tibetan Plateau	Qinghai,Gonghe	UIC-1567	99.77	36.73	3212	Unkown	OSL	11785	880	Madsen et al.,2006
Heimahe1	Qinghai-Tibetan Plateau	Qinghai,Gonghe	Unkown	99.77	36.73	3212	Unkown	OSL	26550	1770	Brantingham et al.,2007
Heimahe1	Qinghai-Tibetan Plateau	Qinghai,Gonghe	Unkown	99.77	36.73	3212	Unkown	OSL	15310	1080	Brantingham et al.,2007
Heimahe1	Qinghai-Tibetan Plateau	Qinghai,Gonghe	Unkown	99.77	36.73	3212	Unkown	OSL	14940	1115	Brantingham et al.,2007
Heimahe1	Qinghai-Tibetan Plateau	Qinghai,Gonghe	Unkown	100.276	36.6175	3209	Unkown	OSL	14400	1000	Zhang and Li,2002
Heimahe1	Qinghai-Tibetan Plateau	Qinghai,Gonghe	Unkown	100.276	36.6175	3209	Unkown	OSL	14300	1000	Sun et al.,2012
Heimahe1	Qinghai-Tibetan Plateau	Qinghai,Gonghe	Unkown	100.276	36.6175	3209	Unkown	OSL	13400	1300	Sun et al.,2012
Heimahe1	Qinghai-Tibetan Plateau	Qinghai,Gonghe	Unkown	100.276	36.6175	3209	Unkown	OSL	12000	900	Sun et al.,2012
Lenghu	Qinghai-Tibetan Plateau	Qinghai,Haixi	Unkown	93.42	38.85	2728	Unkown	OSL	14900	1500	Owen et al.,2006
Longwangchan	North	Shaanxi,Yichuan	L1387	110.402	36.233	456	Deposit Sediment	OSL	21400	1100	Wang and Zhang,2016
Longwangchan	North	Shaanxi,Yichuan	L1388	110.402	36.233	456	Deposit Sediment	OSL	23000	1000	Wang and Zhang,2016
Longwangchan	North	Shaanxi,Yichuan	L1389	110.402	36.233	456	Deposit Sediment	OSL	26800	1200	Wang and Zhang,2016
Longwangchan	North	Shaanxi,Yichuan	L1390	110.402	36.233	456	Deposit Sediment	OSL	24200	1000	Wang and Zhang,2016
Longwangchan	North	Shaanxi,Yichuan	L1391	110.402	36.233	456	Deposit Sediment	OSL	22600	1000	Wang and Zhang,2016
Longwangchan	North	Shaanxi,Yichuan	L1392	110.402	36.233	456	Deposit Sediment	OSL	22800	1100	Wang and Zhang,2016
Longwangchan	North	Shaanxi,Yichuan	L1393	110.402	36.233	456	Deposit Sediment	OSL	23100	1100	Wang and Zhang,2016
Longwangchan	North	Shaanxi,Yichuan	L1394	110.402	36.233	456	Deposit Sediment	OSL	25200	1300	Wang and Zhang,2016
Longwangchan	North	Shaanxi,Yichuan	L1395	110.402	36.233	456	Deposit Sediment	OSL	25600	1200	Wang and Zhang,2016
Longwangchan	North	Shaanxi,Yichuan	L1396	110.402	36.233	456	Deposit Sediment	OSL	25100	1200	Wang and Zhang,2016
Longwangchan	North	Shaanxi,Yichuan	L1397	110.402	36.233	456	Deposit Sediment	OSL	25800	1200	Wang and Zhang,2016
Longwangchan	North	Shaanxi,Yichuan	L1398	110.402	36.233	456	Deposit Sediment	OSL	28700	1400	Wang and Zhang,2016
Longwangchan	North	Shaanxi,Yichuan	L1399	110.402	36.233	456	Deposit Sediment	OSL	27700	1300	Wang and Zhang,2016
Longwangchan	North	Shaanxi,Yichuan	L1400	110.402	36.233	456	Deposit Sediment	OSL	28600	1300	Wang and Zhang,2016
Longwangchan	North	Shaanxi,Yichuan	L1401	110.402	36.233	456	Deposit Sediment	OSL	28800	1400	Wang and Zhang,2016
Nwya Devu	Tibet Plateau	Tibet Plateau,Shenzha	Unkown	88.8	31.466	4600	Unkown	OSL	44800	4100	Zhang et al.,2018
Nwya Devu	Tibet Plateau	Tibet Plateau,Shenzha	Unkown	88.8	31.466	4600	Unkown	OSL	42800	3900	Zhang et al.,2018
Nwya Devu	Tibet Plateau	Tibet Plateau,Shenzha	Unkown	88.8	31.466	4600	Unkown	OSL	36700	3200	Zhang et al.,2018
Nwya Devu	Tibet Plateau	Tibet Plateau,Shenzha	Unkown	88.8	31.466	4600	Unkown	OSL	36200	3400	Zhang et al.,2018
Nwya Devu	Tibet Plateau	Tibet Plateau,Shenzha	Unkown	88.8	31.466	4600	Unkown	OSL	35000	3300	Zhang et al.,2018
Nwya Devu	Tibet Plateau	Tibet Plateau,Shenzha	Unkown	88.8	31.466	4600	Unkown	OSL	29300	2500	Zhang et al.,2018
Nwya Devu	Tibet Plateau	Tibet Plateau,Shenzha	Unkown	88.8	31.466	4600	Unkown	OSL	26700	2200	Zhang et al.,2018
Nwya Devu	Tibet Plateau	Tibet Plateau,Shenzha	Unkown	88.8	31.466	4600	Unkown	OSL	13000	1000	Zhang et al.,2018
Shibazhan	Northeast	Heilongjiang,Tahe	IEE634	125.4	52.416	336	Unkown	OSL	10300	600	Zhang et al.,2006
Shibazhan	Northeast	Heilongjiang,Tahe	IEE634	125.404	25.4185	336	Unkown	OSL	10300	600	Zhang et al.,2006
Shibazhan	Northeast	Heilongjiang,Tahe	IEE635	125.404	25.4185	336	Unkown	OSL	24700	1700	Zhang et al.,2006
Shuidonggou	Northwest	Ningxia,Lingwu	IEE1110	106.504	38.297	1225	Unkown	OSL	11600	600	Pei et al.,2012
Shuidonggou	Northwest	Ningxia,Lingwu	Unkown	106.504	38.297	1225	Unkown	OSL	38300_x0002_	3500	Liu et al.,2009
Shuidonggou	Northwest	Ningxia,Lingwu	Unkown	106.504	38.297	1225	Unkown	OSL	34800_x0002_	1500	Liu et al.,2009
Shuidonggou	Northwest	Ningxia,Lingwu	Unkown	106.504	38.297	1225	Unkown	OSL	33100_x0002_	1700	Liu et al.,2008
Shuidonggou	Northwest	Ningxia,Lingwu	Unkown	106.504	38.297	1225	Unkown	OSL	20300_x0002_	1000	Liu et al.,2009
Shuidonggou	Northwest	Ningxia,Lingwu	Unkown	106.504	38.297	1225	Unkown	OSL	35700	1600	Liu et al.,2009
Shuidonggou	Northwest	Ningxia,Lingwu	Unkown	106.504	38.297	1225	Unkown	OSL	32800	3000	Liu et al.,2009
Shuidonggou	Northwest	Ningxia,Lingwu	Unkown	106.504	38.297	1225	Unkown	OSL	29300	4100	Liu et al.,2009
Shuidonggou	Northwest	Ningxia,Lingwu	Unkown	106.504	38.297	1225	Unkown	OSL	29200	2100	Liu et al.,2009
Shuidonggou	Northwest	Ningxia,Lingwu	Unkown	106.504	38.297	1225	Unkown	OSL	28700	6000	Liu et al.,2009
Shuidonggou	Northwest	Ningxia,Lingwu	Unkown	106.504	38.297	1225	Unkown	OSL	27800	1400	Liu et al.,2009
Shuidonggou	Northwest	Ningxia,Lingwu	Unkown	106.504	38.297	1225	Unkown	OSL	27200	1500	Liu et al.,2009
Shuidonggou	Northwest	Ningxia,Lingwu	Unkown	106.504	38.297	1225	Unkown	OSL	26300	2700	Liu et al.,2009
Shuidonggou	Northwest	Ningxia,Lingwu	Unkown	106.504	38.297	1225	Unkown	OSL	25200	1800	Liu et al.,2009
Shuidonggou	Northwest	Ningxia,Lingwu	Unkown	106.504	38.297	1225	Unkown	OSL	23600	2400	Liu et al.,2009
Shuidonggou	Northwest	Ningxia,Lingwu	Unkown	106.504	38.297	1225	Unkown	OSL	20500	1100	Liu et al.,2009
Shuidonggou	Northwest	Ningxia,Lingwu	Unkown	106.504	38.297	1225	Unkown	OSL	19600	2500	Liu et al.,2009
Shuidonggou	Northwest	Ningxia,Lingwu	Unkown	106.504	38.297	1225	Unkown	OSL	18900	900	Liu et al.,2009
Shuidonggou	Northwest	Ningxia,Lingwu	Unkown	106.504	38.297	1225	Unkown	OSL	17700	900	Liu et al.,2009
Shuidonggou	Northwest	Ningxia,Lingwu	Unkown	106.504	38.297	1225	Unkown	OSL	15800	1100	Liu et al.,2009
Shuidonggou	Northwest	Ningxia,Lingwu	Unkown	106.504	38.297	1225	Unkown	OSL	12100	1100	Liu et al.,2008
Taoshan	Northeast	Heilongjiang,Yichun	L2504	128.2	46.9	232	Unkown	OSL	10100	500	Zou et al.,2018
Taoshan	Northeast	Heilongjiang,Yichun	L2505	128.2	46.9	232	Unkown	OSL	13900	600	Zou et al.,2018
Taoshan	Northeast	Heilongjiang,Yichun	L2506	128.2	46.9	232	Unkown	OSL	12400	600	Zou et al.,2018
Taoshan	Northeast	Heilongjiang,Yichun	L2508	128.2	46.9	232	Unkown	OSL	10900	500	Zou et al.,2018
Taoshan	Northeast	Heilongjiang,Yichun	L2509	128.2	46.9	232	Unkown	OSL	13600	700	Zou et al.,2018
Taoshan	Northeast	Heilongjiang,Yichun	L2510	128.2	46.9	232	Unkown	OSL	11600	500	Zou et al.,2018
Xiao Qaidam Lake	Tibet Plateau	Qinghai,Haixi	XCDH3-C	95.518	37.4573	3180	Unkown	OSL	10800	1200	Sun et al.,2010
Xiao Qaidam Lake	Tibet Plateau	Qinghai,Haixi	XCDH4-A	95.518	37.4573	3180	Unkown	OSL	37000	4000	Sun et al.,2010
Youfang	North	Hebei,Yangyuan	L2303	114.683	40.233	1012	Unkown	OSL	26400	2100	Nian et al.,2014
Youfang	North	Hebei,Yangyuan	L2304	114.683	40.233	1012	Unkown	OSL	26600	2100	Nian et al.,2014
Youfang	North	Hebei,Yangyuan	L2305	114.683	40.233	1012	Unkown	OSL	25100	2000	Nian et al.,2014
Youfang	North	Hebei,Yangyuan	L2306	114.683	40.233	1012	Unkown	OSL	29200	2000	Nian et al.,2014
Youfang	North	Hebei,Yangyuan	L2307	114.683	40.233	1012	Unkown	OSL	27900	1900	Nian et al.,2014
Youfang	North	Hebei,Yangyuan	L2308	114.683	40.233	1012	Unkown	OSL	30800	2300	Nian et al.,2014
Youfang	North	Hebei,Yangyuan	L2309	114.683	40.233	1012	Unkown	OSL	33000	3600	Nian et al.,2014
Youfang	North	Hebei,Yangyuan	L2310	114.683	40.233	1012	Unkown	OSL	34600	3100	Nian et al.,2014
Youfang	North	Hebei,Yangyuan	L2311	114.683	40.233	1012	Unkown	OSL	42900	2900	Nian et al.,2014
Youfang	North	Hebei,Yangyuan	Unkown	114.683	40.233	1012	Unkown	OSL	16200	2000	Tsuneto et al.,2009
Youfang	North	Hebei,Yangyuan	Unkown	114.683	40.233	1012	Unkown	OSL	16200	2000	Wei,2009
Youfang	North	Hebei,Yangyuan	Unkown	114.683	40.233	1012	Unkown	OSL	16000	3000	Tsuneto et al.,2009
Youfang	North	Hebei,Yangyuan	Unkown	114.683	40.233	1012	Unkown	OSL	16000	3000	Wei,2009
Youfang	North	Hebei,Yangyuan	Unkown	114.683	40.233	1012	Unkown	OSL	14000	4000	Tsuneto et al.,2009
Youfang	North	Hebei,Yangyuan	Unkown	114.683	40.233	1012	Unkown	OSL	14000	3000	Tsuneto et al.,2009
Youfang	North	Hebei,Yangyuan	Unkown	114.683	40.233	1012	Unkown	OSL	14000	3000	Wei,2009
Youfang	North	Hebei,Yangyuan	Unkown	114.683	40.233	1012	Unkown	OSL	14000	4000	Wei,2009
Yushuiping	Southwest	Yunnan,Lanping	YSP-1-115	99.52	26.71	2530	Unkown	OSL	38650	1970	Liu,2016
Yushuiping	Southwest	Yunnan,Lanping	YSP-1-42	99.52	26.71	2530	Unkown	OSL	36900	1550	Liu,2016
Yushuiping	Southwest	Yunnan,Lanping	YSP-1-115	99.52	26.71	2530	Unkown	OSL	38650	1970	Liu,2016
Yushuiping	Southwest	Yunnan,Lanping	YSP-1-42	99.52	26.71	2530	Unkown	OSL	36900	1550	Liu,2016
Yushuiping	Southwest	Yunnan,Lanping	Unkown	99.52	26.71	2530	Unkown	OSL	38650	1970	Liu,2016
Yushuiping	Southwest	Yunnan,Lanping	Unkown	99.52	26.71	2530	Unkown	OSL	36900	1550	Liu,2016
References:
Zhang DJ, Chen FH, Bettinger RL et al. (2010) Archaeological records and the origin of dry farming from the site of Dadiwan in Gansu province. Science Bulletin (10): 883-890 (In Chinese).
Madsen DB, Haizhou M, Brantingham PJ et al. (2006) The late Upper Paleolithic occupation of the northern Tibetan Plateau margin. Journal of Archaeological Science 33(10): 1433-1444.
Brantingham PJ, Gao X, Olsen JW et al. (2007) A short chronology for the peopling of the Tibetan Plateau. Developments in Quaternary Sciences 9: 129-150.
Zhang DD and Li SH. (2002) Optical dating of Tibetan human hand‐and footprints: An implication for the palaeoenvironment of the last glaciation of the Tibetan Plateau. Geophysical Research Letters 29(5): 16-1-16-3.
Sun YJ, Lai ZP, Madsen D et al. (2012) Luminescence dating of a hearth from the archaeological site of Jiangxigou in the Qinghai Lake area of the northeastern Qinghai-Tibetan Plateau. Quaternary Geochronology 12: 107-110.
Owen LA, Finkel RC, Haizhou M et al. (2006) Late Quaternary landscape evolution in the Kunlun Mountains and Qaidam Basin, Northern Tibet: a framework for examining the links between glaciation, lake level changes and alluvial fan formation. Quaternary International 154: 73-86.
Wang XQ and Zhang JF. (2016) Microstone processing technology and age of the first site of Longwangchan site — on the origin of microstone in north China. Relics from South 4: 49-56(In Chinese).
Zhang XL, Ha BB, Wang SJ et al. (2018) The earliest human occupation of the high-altitude Tibetan Plateau 40 thousand to 30 thousand years ago. Science 362(6418): 1049-1051.
Zhang XL, Yu HL, Gao X. (2006) New findings and dates of the Shibazhan Paleolithic site, Heilongjiang Province. Acta Anthropologica Sinica 25: 115e128(In Chinese).
Pei SW, Gao X, Wang HM et al. (2012) The Shuidonggou site complex: new exca-vations and implications for the earliest Late Paleolithic in North China. Journalof Archaeological Science 39: 3610e3626.
Liu D, Wang X, Gao X et al. (2009) Progress in the stratigraphy and geochronology of the Shuidonggou site, Ningxia, North China. Chinese Science Bulletin 54(21): 3880.
Liu DC, Chen FY, Zhang XL et al. (2008) Preliminary comments on the paleoenvironment of the Shuidonggou Locality 12. Acta Anthropologica Sinica 27(4): 295-303.
Zou GN, Shelach G, Li XQ et al. (2018) Geochronology and paleoenvironment of the Taoshan site, northeastern China, and archaeological implications. Quaternary International 463: 6-17.
Sun Y, Lai Z, Long H et al. (2010) Quartz OSL dating of archaeological sites in Xiao Qaidam Lake of the NE Qinghai–Tibetan Plateau and its implications for palaeoenvironmental changes. Quaternary Geochronology 5(2-3): 360-364.
Nian X, Gao X, Xie F, et al. (2014) Chronology of the Youfang site and its implications for the emergence of microblade technology in North China. Quaternary International 347: 113-121.
Tsuneto N, Yorinao S et al. (2009) OSL dating of thestrata at Paleolithic sites in the Nihewan Basin, China. Acta Anthropologica Sinica 28: 276e287.
Wei Q (2009) OSL dates of several paleolithic cultural sites in Nihewan Basin. Acta Anthropologica Sinica (3): 276-284.
Tsuneto N1, Yorinao S, Hisae N, et al. (2009) OSL dating of the strata at Paleolithic sites in the Nihewan Basin, China. Acta Anthropologica Sinica 28(3): 276-284.
Liu HG (2016) Human activities and agriculture resources utilization from Paleolithic to Bronze Age in northwest Yunnan province. Doctoral dissertation, Lanzhou University.
